# Supplementary material
Source: publisher figshare collection journal article supplement (https://gsapubs.figshare.com/ndownloader/files/23303444)
Supplement: Supplementary file 1 [file 23303444]

GSA Data Repository Item 2016069

Grasby, S.E., McCune, G.E., Beauchamp, B., and Galloway, J.M., 2016, Lower Cretaceous cold snaps led to widespread glendonite occurrences in the Sverdrup Basin, Canadian High Arctic: GSA Bulletin, doi:10.1130/B31600.1.

## **DATA REPOSITORY TABLES**

Figure DR1. Representative range of glendonite size and shapes from locality CH1 (Christopher Formation).

Figure DR2. Representative range of glendonite size and shapes from locality CH2 (Christopher Formation).

Figure DR3. Representative range of glendonite size and shapes from locality DB1 (Deer Bay Formation).

Figure DR4. Representative range of glendonite size and shapes from locality DB2 (Deer Bay Formation).

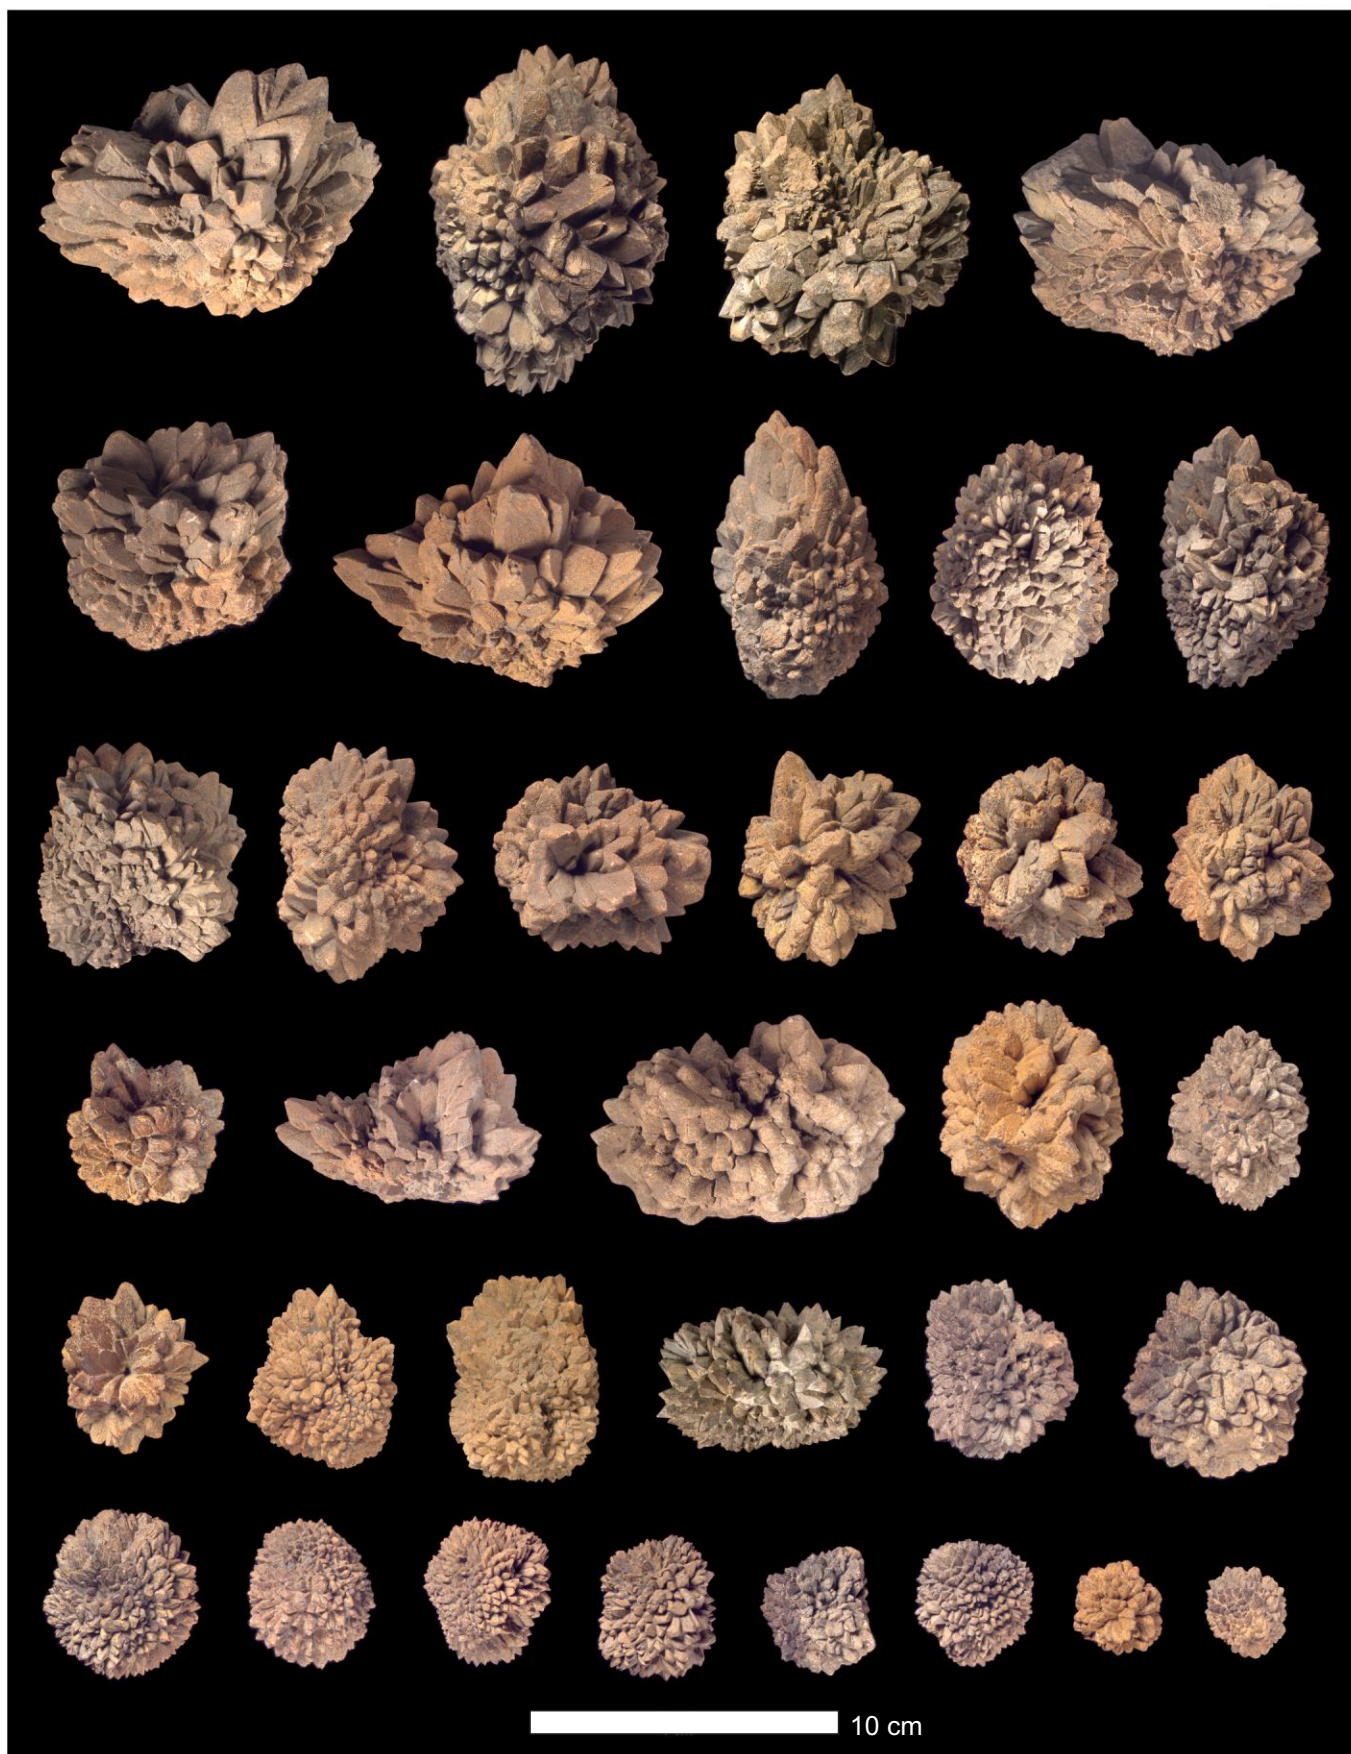

Grasby et al. Figure DR1



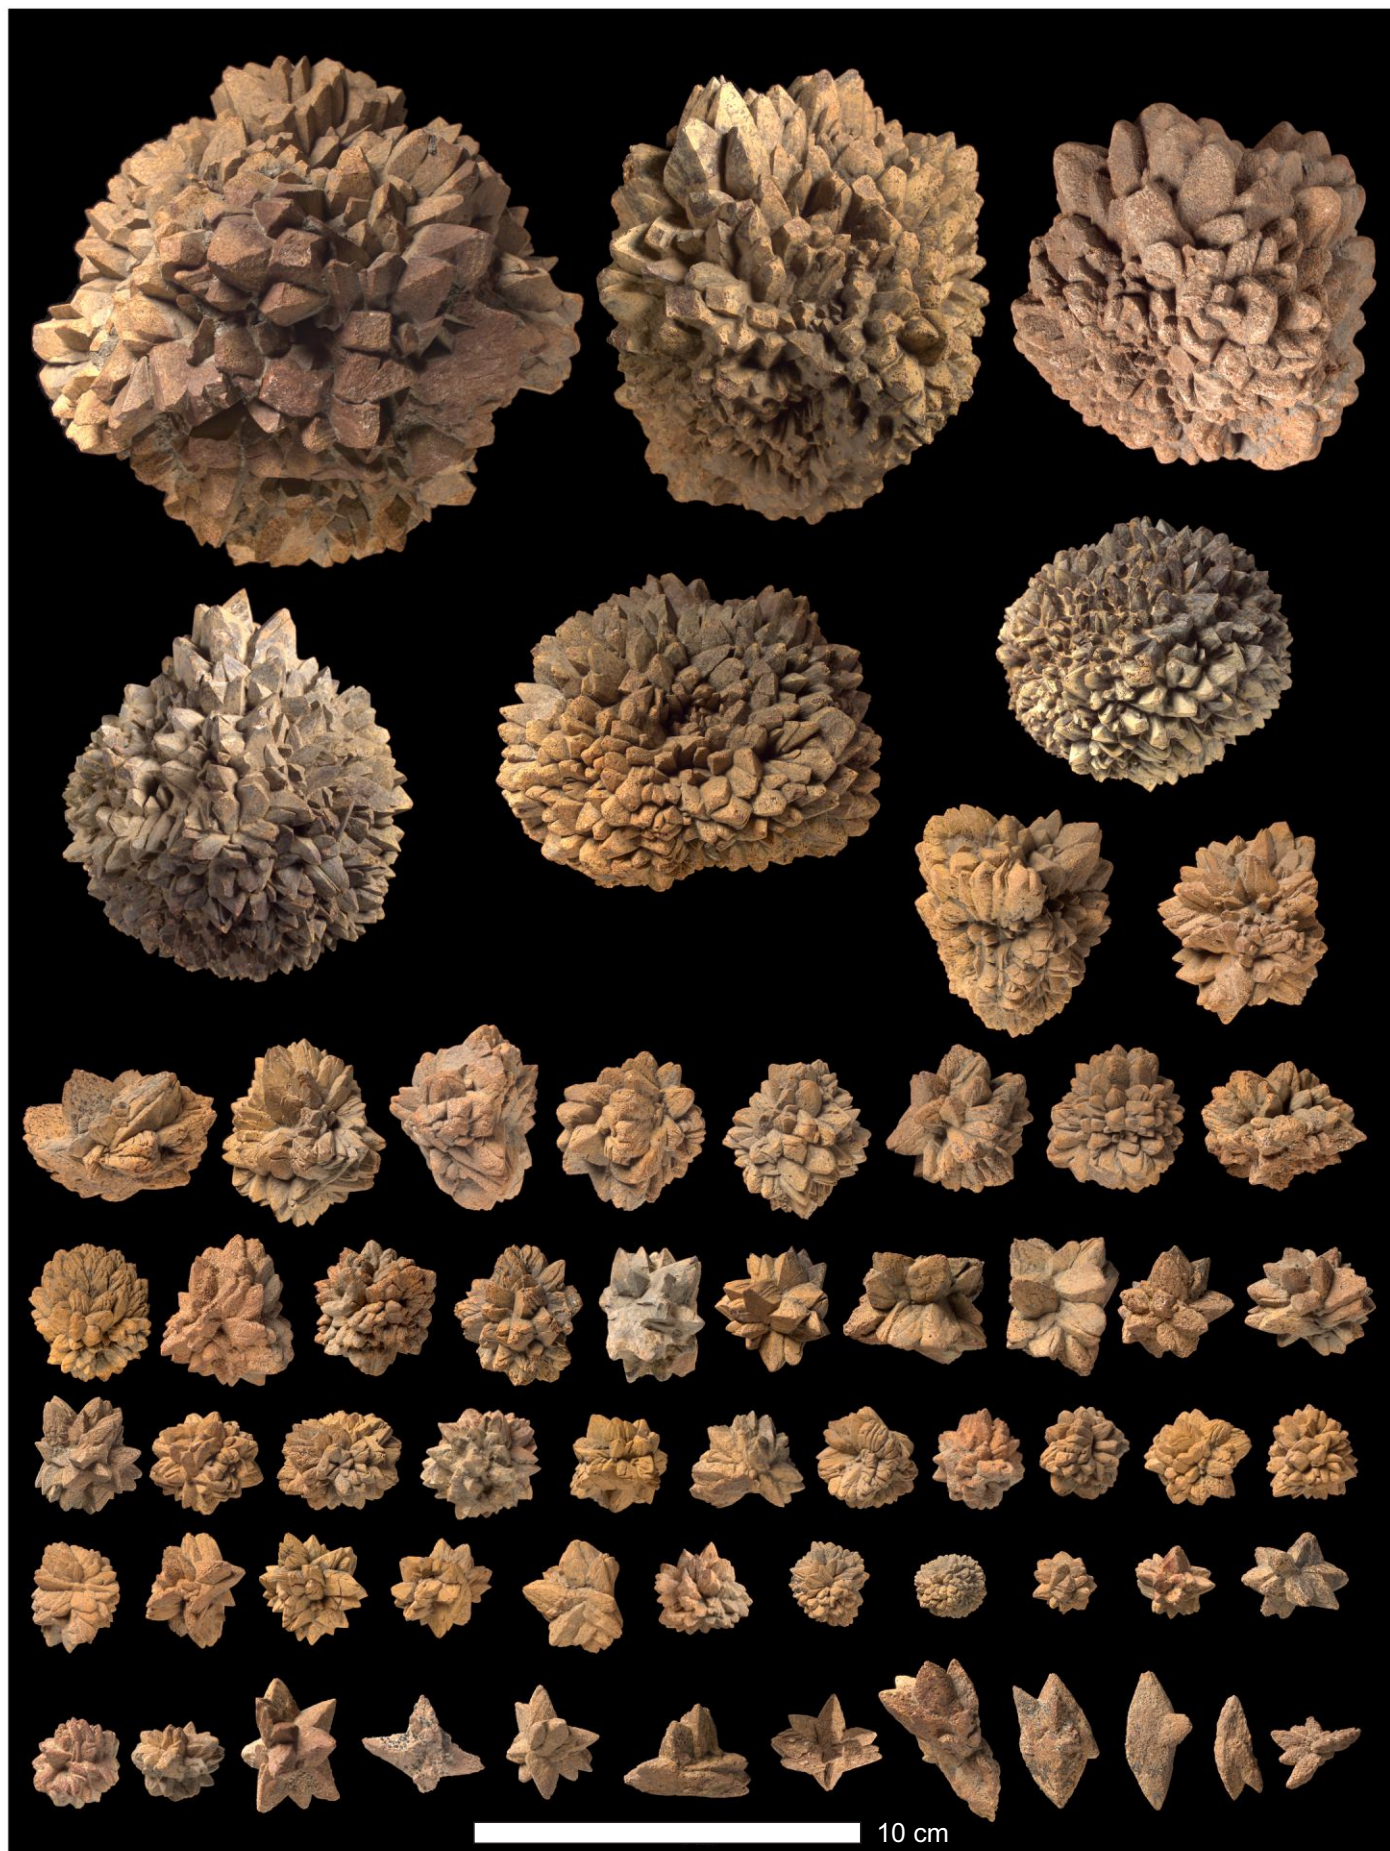

Grasby et al. Figure DR2



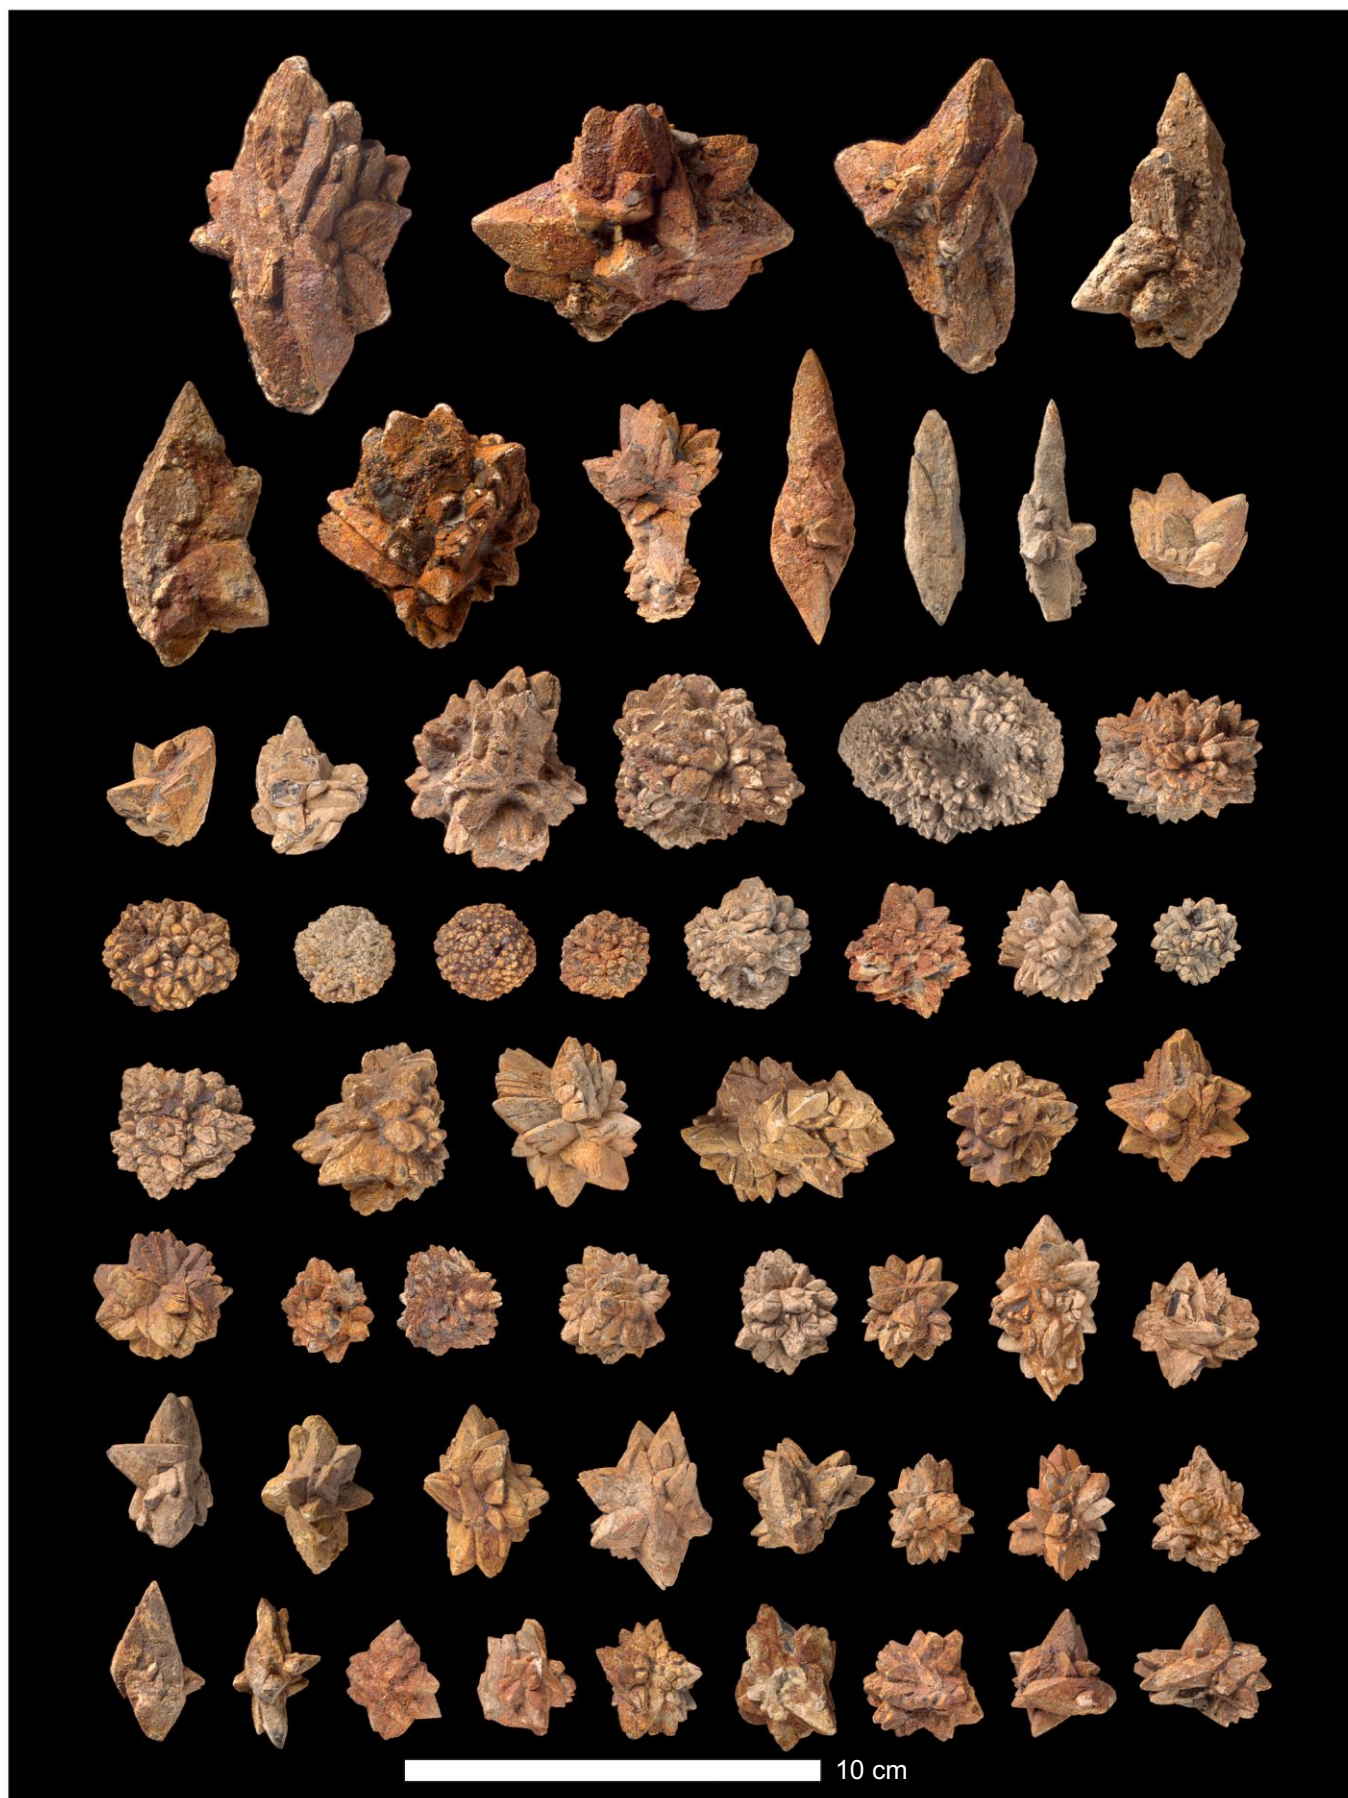

Grasby et al. Figure DR3



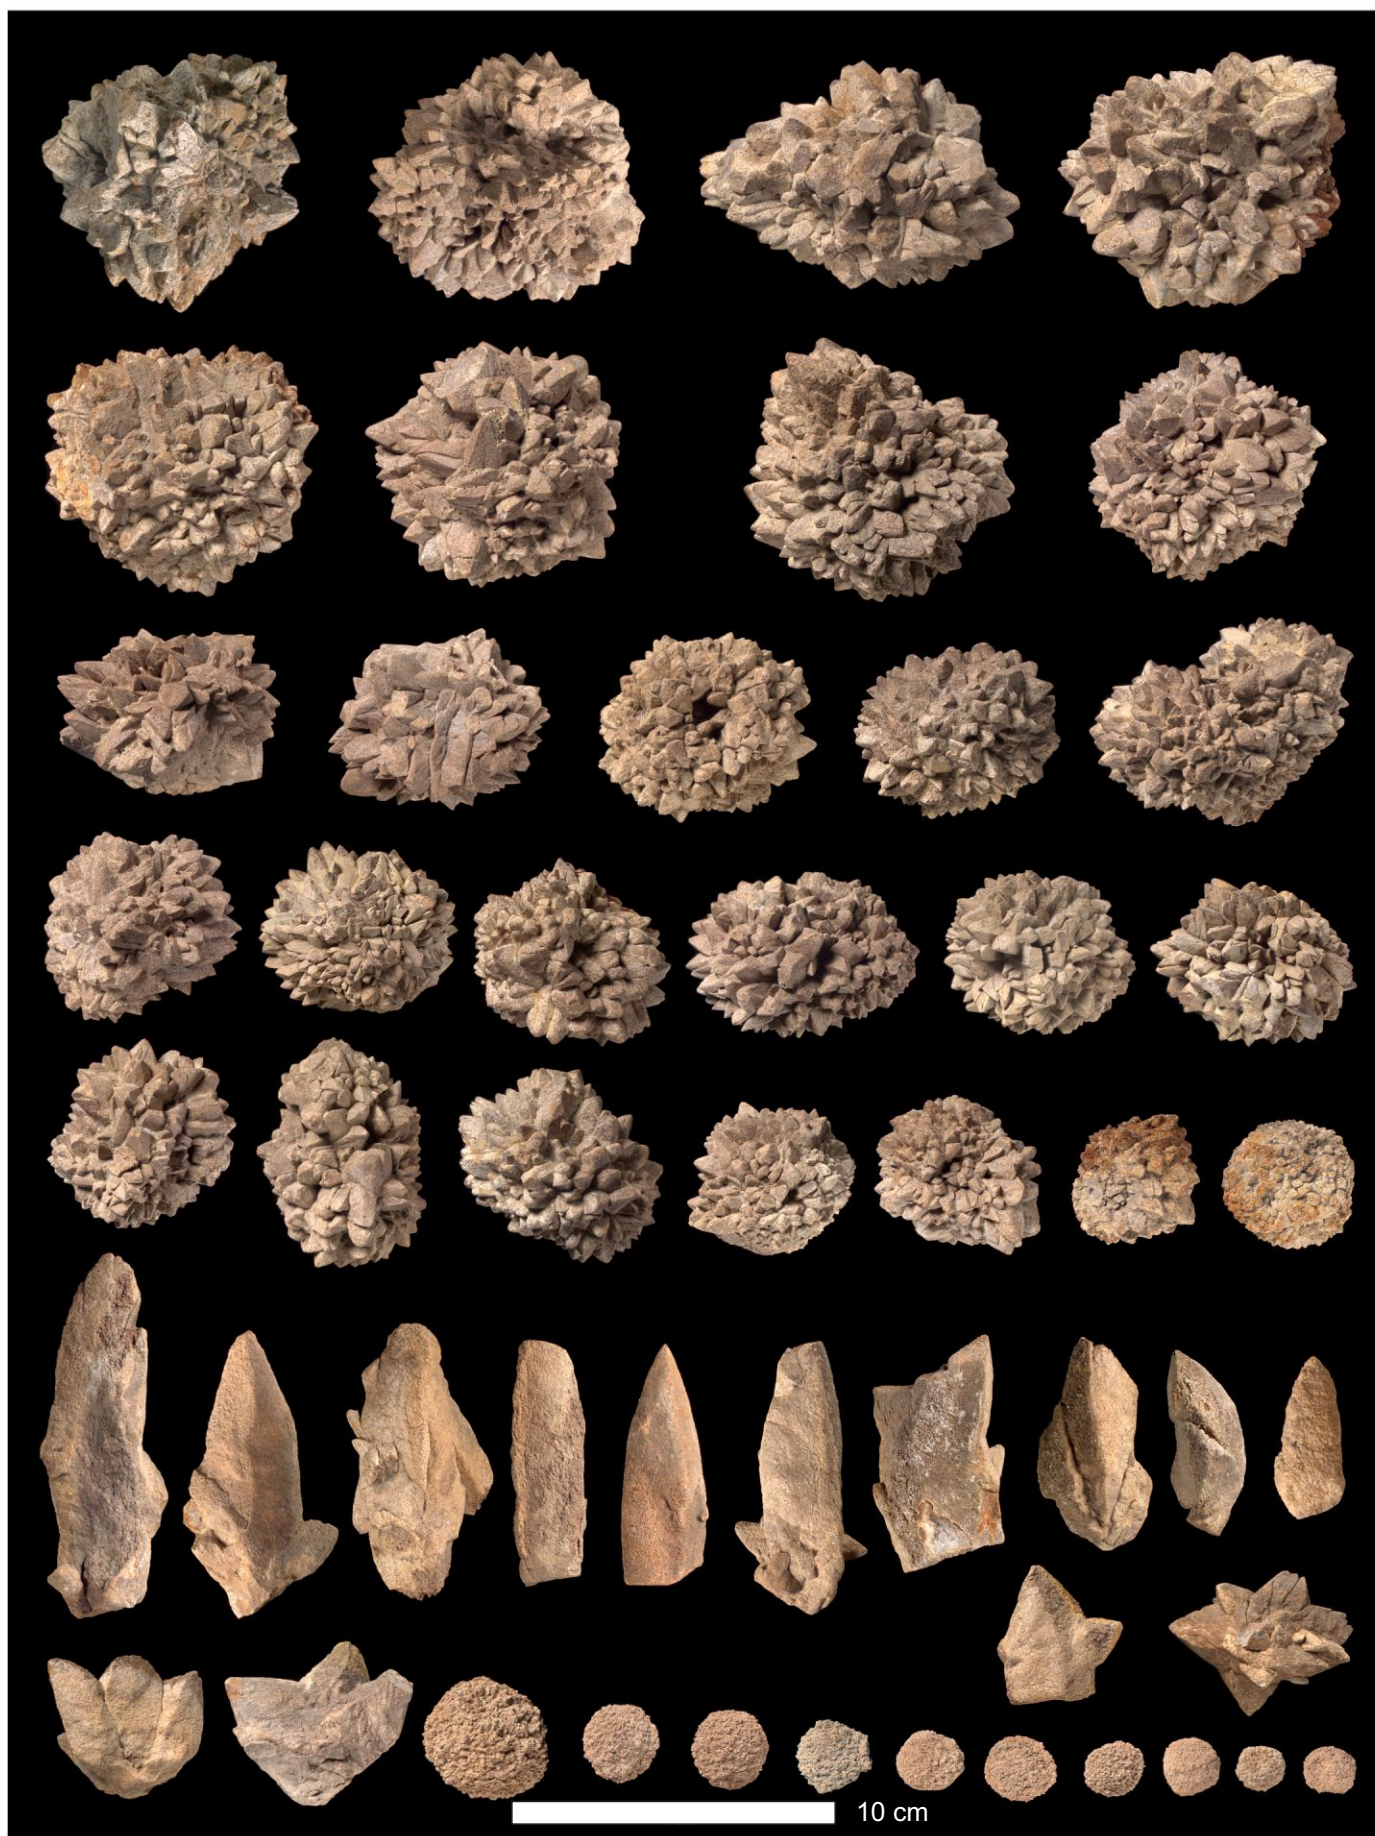

Grasby et al. Figure DR4
